# Supplementary material for: Comparative Study of Short-Term Efficacy and Safety of Radical Surgery with or without Hyperthermic Intraperitoneal Chemotherapy in Colorectal Cancer with T4 Stage: A Propensity Score Matching Analysis
Source: MDPI journal article supplement (doi:10.3390/jcm12031145), 2023-02-01
Supplement: s1 [file s1]

**Supplementary Table S1.** Definition of CTCAE V5.0 adverse events

| Adverse event       | Definition                                                                                      | I                                                                                                                                     | II                                                                                                                         | III                                                                                                               | IV                                                 |
|---------------------|-------------------------------------------------------------------------------------------------|---------------------------------------------------------------------------------------------------------------------------------------|----------------------------------------------------------------------------------------------------------------------------|-------------------------------------------------------------------------------------------------------------------|----------------------------------------------------|
| Anemia              | A disease characterized by a decrease in the total amount of hemoglobin in 100 ml of blood      | Hemoglobin < lower limit of normal value ~ 10.0 g / dl<Lower limit of normal value ~ 6.2mmol/l<Lower limit of normal value ~ 100g / L | Hemoglobin < 10.0 ~ 8.0g/dl<6.2 ~4.9mmol/L; < 100~80g/L                                                                    | Hemoglobin < 8.0g/dl<4.9mmol/L; < 80 g/L; Blood transfusion is needed                                             | Life threatening; Urgent treatment is needed       |
| Hypoalbuminemia     | The results of laboratory examination showed that the concentration of albumin in blood was low | < lower limit of normal value ~ 3 g / dl<Lower limit of normal value ~ 30 g / L                                                       | <3~2 g/dL; <30~20 g/L                                                                                                      | <2 g/dL; <20 g/L                                                                                                  | Life threatening; Urgent treatment is needed       |
| Myelosuppression    | A disease characterized by decreased hematopoietic function of bone marrow                      | Slightly too few cells or a decrease of ≤ 25% compared with the total number of normal cells in this age group                        | Moderately too few cells or a decrease of > 25% and < 50% compared with the total number of normal cells in this age group | Severe cytopenia or reduction of > 50% and ≤ 75% compared with the total number of normal cells in this age group | The aplastic disorder lasted for more than 2 weeks |
| Wound complications | New abnormalities in the existing wound site                                                    | It can be observed that local treatment is needed                                                                                     | Local care is required                                                                                                     | Surgery is needed                                                                                                 | Life threatening; Urgent treatment is needed       |

|                        |                                                                                      |                                                                  |                                                                                                          |                                                                                                                |                                              |
|------------------------|--------------------------------------------------------------------------------------|------------------------------------------------------------------|----------------------------------------------------------------------------------------------------------|----------------------------------------------------------------------------------------------------------------|----------------------------------------------|
| Abdominal infection    | Abdominal infection                                                                  | -                                                                | Oral administration is required (e.g. antibiotics, antifungal or antiviral drugs)                        | Intravenous antibiotics, antifungal or antiviral drugs are needed; Invasive treatment is needed                | Life threatening; Urgent treatment is needed |
| Pulmonary infection    | Infectious diseases, including pneumonia, occurring in the lungs.                    | -                                                                | Moderate symptoms; Oral medication (antibiotics, antifungal or antiviral drugs) is required              | Intravenous antibiotics, antifungal or antiviral drugs are needed; Invasive treatment is needed                | Life threatening; Urgent treatment is needed |
| Postoperative bleeding | Postoperative disorder characterized by bleeding                                     | The symptoms are mild and need no treatment                      | Moderate bleeding requiring blood transfusion (blood transfusion volume < 2 units (infants < 10cc / kg)) | Blood transfusion volume > 2 units (infants > 10 cc / kg), invasive treatment and hospitalization are required | Life threatening; Urgent treatment is needed |
| Anastomotic leakage    | Rupture of gastrointestinal anastomosis and leakage of contents                      | The diagnostic findings were asymptomatic; No treatment required | Symptomatic; Need treatment                                                                              | Serious; Invasive treatment is needed                                                                          | Life threatening; Urgent treatment is needed |
| Ileus                  | A disease characterized by the inability of the gut to transport intestinal contents | No clinical symptoms, only radiation observation is required     | Symptomatic; Gastrointestinal function changes; fasting                                                  | Severe changes of gastrointestinal function; Total parenteral nutrition is required; Catheterization is needed | Life threatening; Urgent treatment is needed |

---

**Supplementary Table S2.** HIPEC drug utilization

| <b>Drug</b> | <b>No. (%)</b> | <b>Dosage<br/>(mg/m2)</b> |
|-------------|----------------|---------------------------|
| Raltitrexed | 44 (26.7)      | 2                         |
| Lobaplatin  | 99 (60.0)      | 35                        |
| Mitomycin   | 16 (9.7)       | 35                        |
| Oxaliplatin | 6 (3.6)        | 35                        |

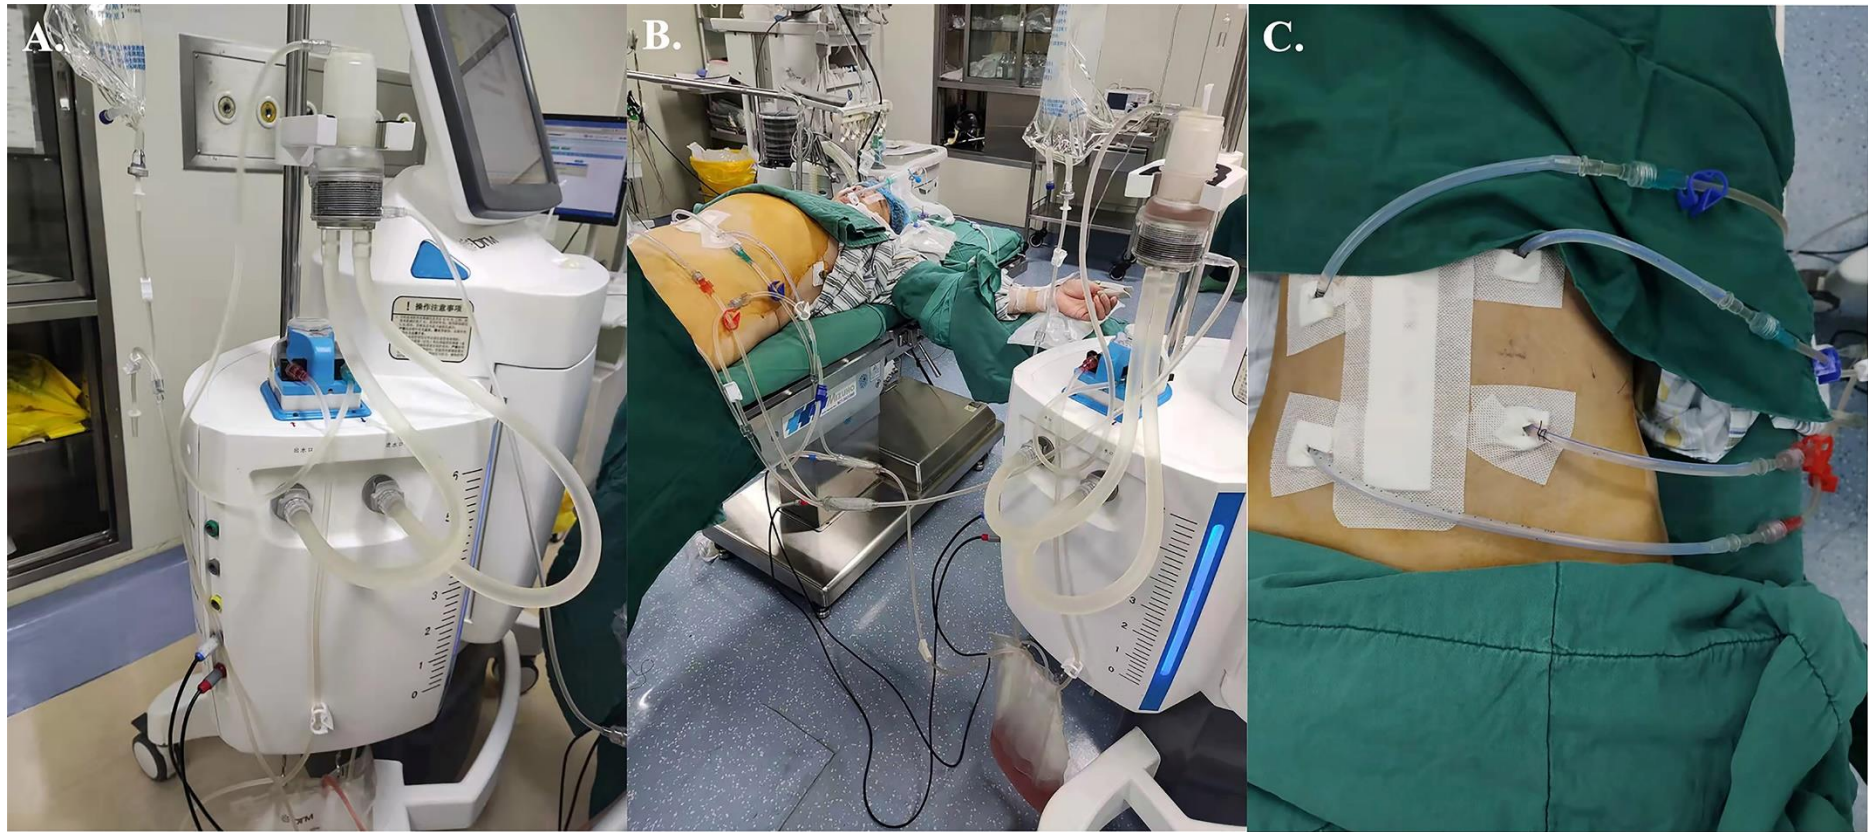

**Supplementary Figure S1.** Perfusion equipment and pipe connection. (A)The BRTRG-I hyperthermic perfusion intraperitoneal treatment system (Bright Medical Tech, Guangzhou, China). (B)Pipe connection. The red tube is the inlet tube, and the blue tube is the outlet tube. The perfusion fluid enters the abdominal cavity from the red tube below and flows out through the blue tube above. (C)Four tubes were used for circulatory perfusion; two each were placed in the upper and lower abdomen.

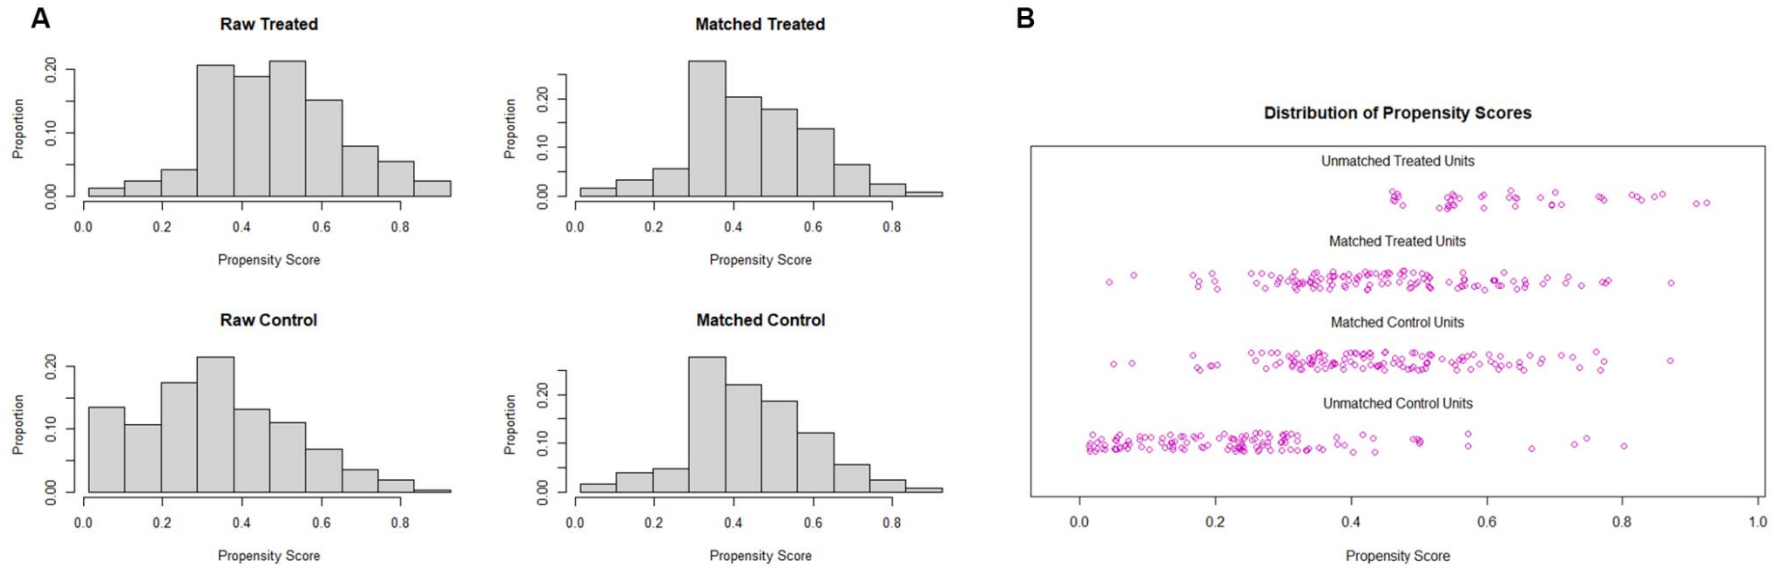

**Supplementary Figure S2.** Propensity score matching (PSM). (A) Histogram of propensity score. (B) Distribution of propensity score.

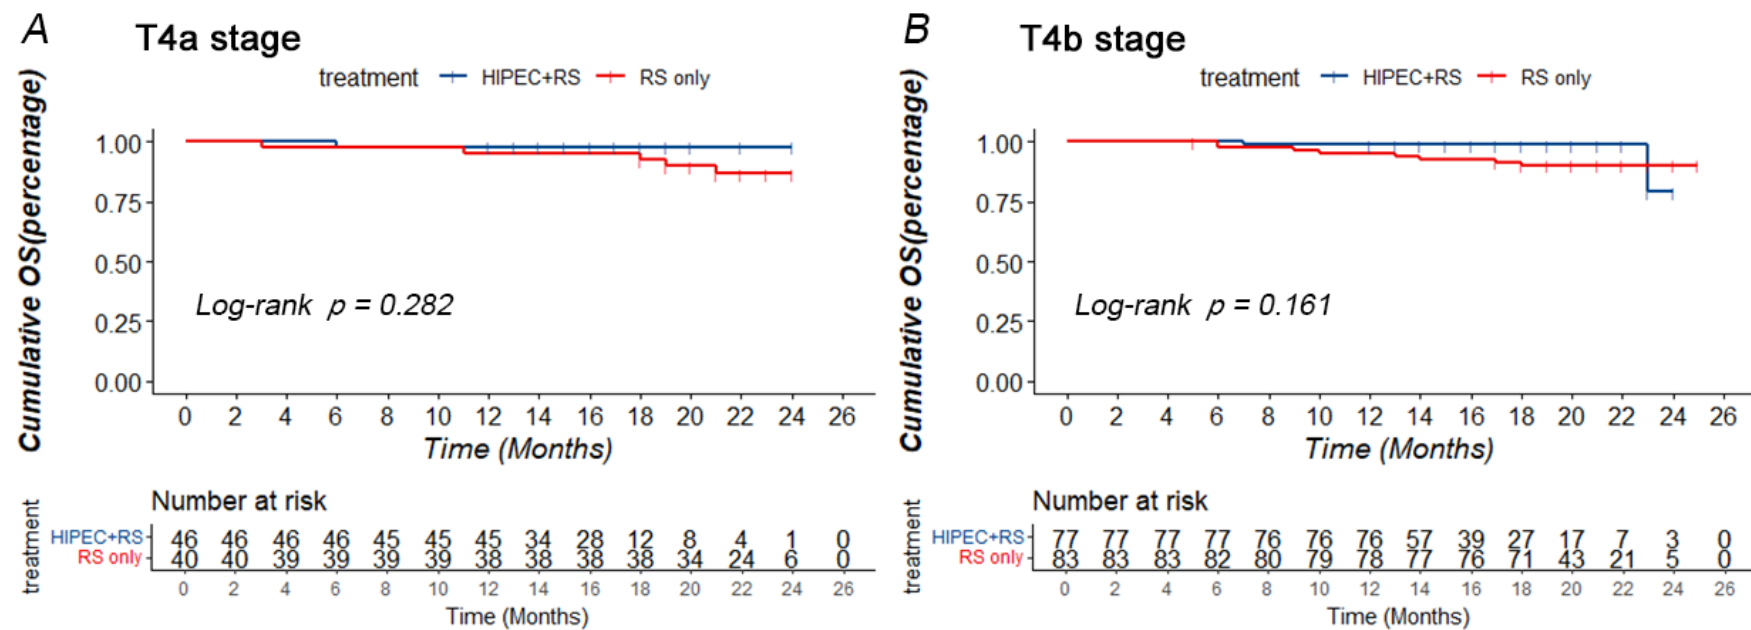

**Supplementary Figure S3.** Subgroup analysis based on T stage. (A) OS of RS+HIPEC group and RS group after PSM when the tumor at T4a stage. (B) OS of RS+HIPEC group and RS group after PSM when the tumor at T4b stage.

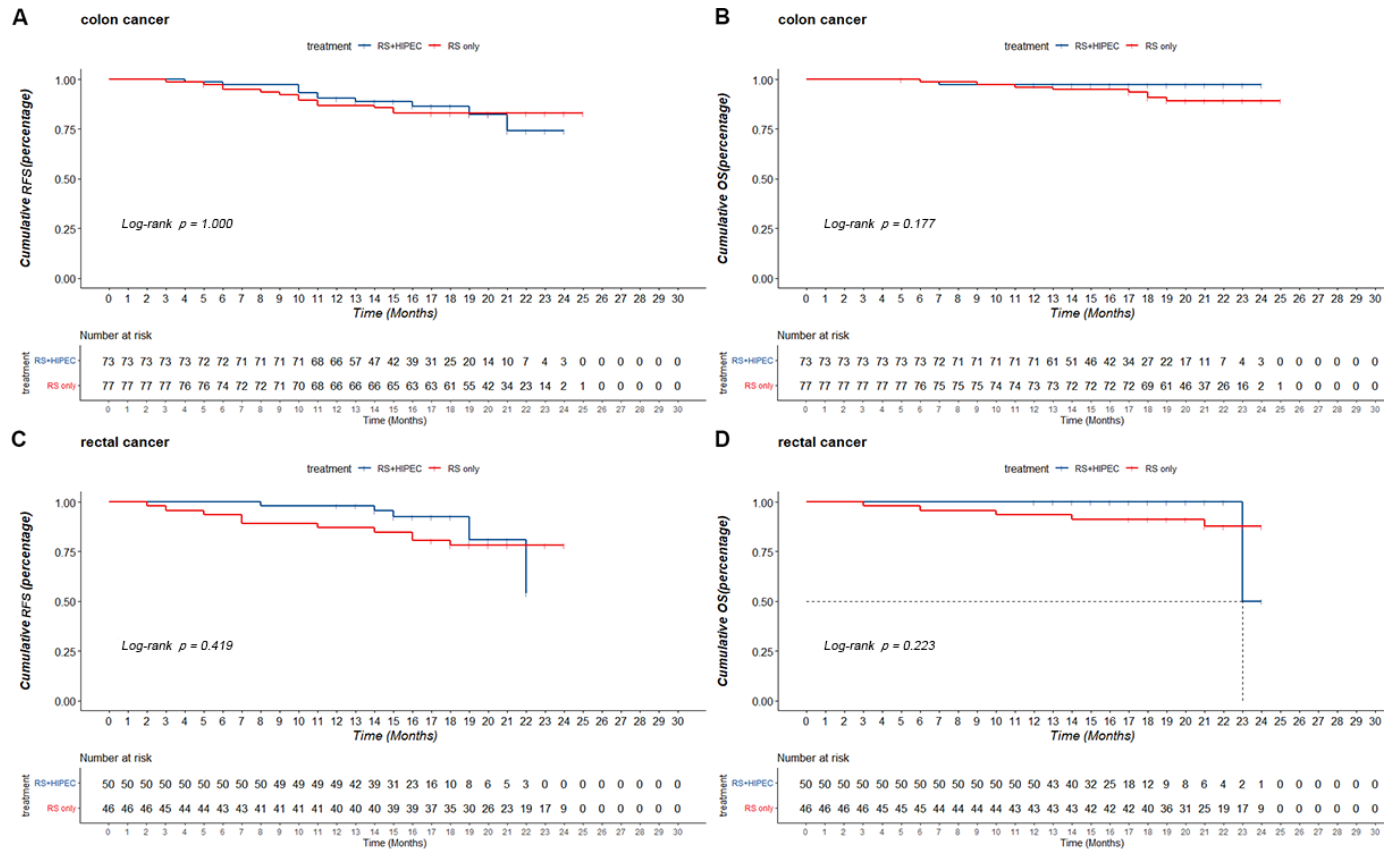

**Supplementary Figure S4.** Subgroup analysis based on tumor location. (A) RFS of RS+HIPEC group and RS group after PSM when the tumor at colon. (B) OS of RS+HIPEC group and RS group after PSM when the tumor at colon. (C) RFS of RS+HIPEC group and RS group after PSM when the tumor at rectum. (D) OS of RS+HIPEC group and RS group after PSM when the tumor at rectum.

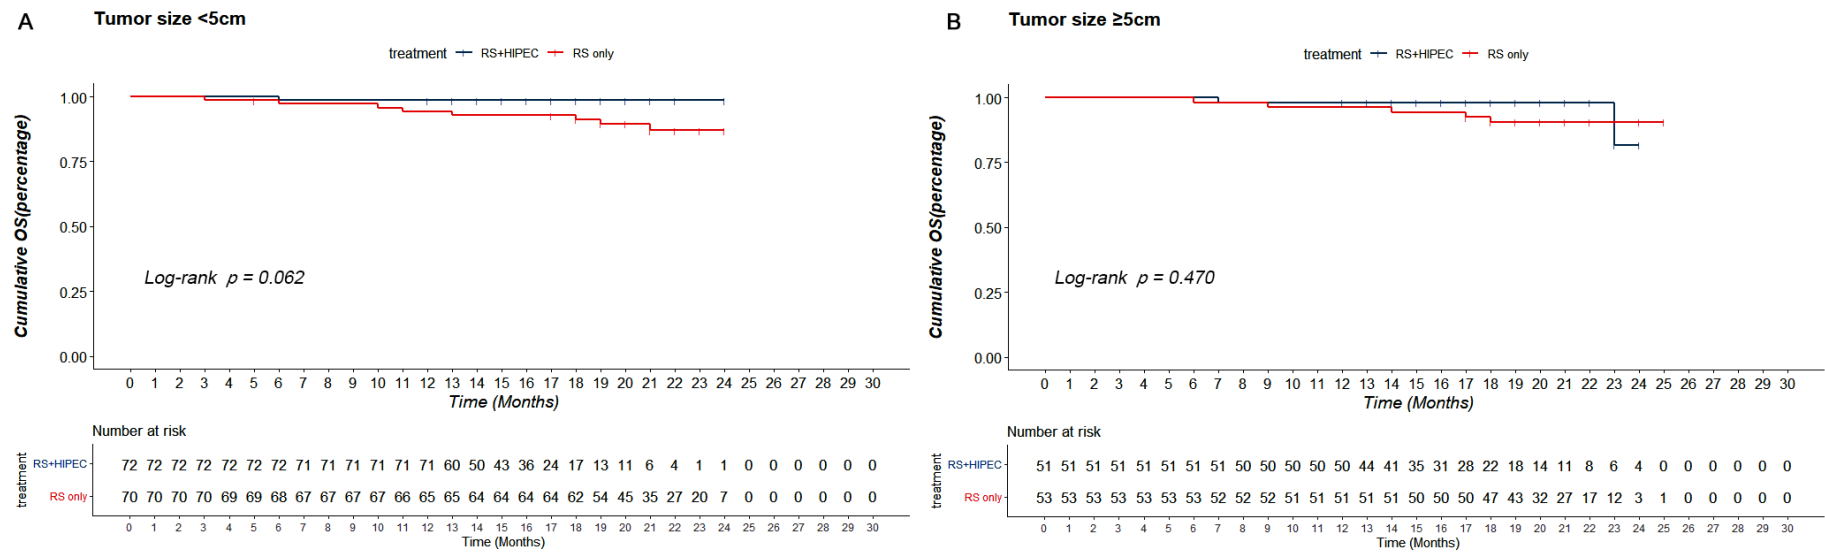

**Supplementary Figure S5.** Subgroup analysis based on tumor size. (A) OS of RS+HIPEC group and RS group after PSM when the tumor <5cm. (B) OS of RS+HIPEC group and RS group after PSM when the tumor  $\geq 5$ cm.
